# Supplementary material
Source: PubMed Central journal article supplement (PMC8823286)
Supplement: NIHMS1775405-supplement-supplementary_material.pdf [file NIHMS1775405-supplement-supplementary_material.pdf]

# Demographics

---

Participant ID

(Participant ID format should be AA### where AA is the institution initials. For example, Michigan's first patient would be UM001)

---

Institution

- University of Michigan (UM)
- Duke University (DU)
- Columbia Presbyterian (COL)
- Northwestern (NW)
- University of California San Francisco (UCSF)
- University of Washington (UW)

---

Gender

- Male
- Female

---

Race

- White
- Black
- Asian
- Native Indian/Alaskan
- Hispanic
- Other

---

Other Race

\_\_\_\_\_

---

Date of Birth

\_\_\_\_\_

---

Etiology

- HCV
- ALD
- NASH
- HBV
- AIH
- PSC
- PBC
- DILI(drug)
- Hemochromatosis
- FHF (cause)
- Wilson
- A1AT
- Idiopathic/cryptogenic
- Other

---

Other Etiology

\_\_\_\_\_

---

HCC

- Yes
- No

---

Highest Education Level

- Less than High School
- High School
- Some College
- Associate's Degree
- Bachelor's Degree
- Master's Level or higher

# Listing\_Characteristics

Listing\_Date\_LK

(If not same for SLK then add kidney listing in the next field)

Listing\_date\_kid

(add kidney listing date, if different)

## Candidate Co-morbidities

Hypertension

- Yes  
 No

Diabetes

- Yes  
 No

CAD

- Yes  
 No

CAD\_type

- stent  
 CABG  
 Medical\_Rx  
 Arrhythmia\_rx  
 Other

Renal\_dysfunction\_livlist

- Yes  
 No  
(at SLK listing, if kidney listing is later then at kidney listing)

Renal\_dys\_kidlist

- Yes  
 No  
(If kidney listing is at a later date)

renal\_dys\_type

- AKI  
 CKD  
(Based upon RIFLE criteria; at SLK listing, if kidney listing is later then at kidney listing)

AKI\_treatment

- no RRT  
 RRT

AKI\_type

- Pre-renal/HRS  
 ATN  
 Other  
 Unknown

CKD\_Type

- Stage 4  
 Stage 5  
 Inborn metabolic disorders

CKD\_treatment

- HD  
 No HD

**Portal Hypertension complications**

Ascites  no  
 mild  
 moderate  
 severe

Hepatic\_encephalopathy  Yes  
 No

Esophageal\_Varices  Yes  
 No

Hepatorenal\_syn  Yes  
 No

**Listing\_labs**

Serum\_Creatinine \_\_\_\_\_

Serum\_Bilirubin \_\_\_\_\_

INR \_\_\_\_\_

Serum\_Na \_\_\_\_\_

Serum\_Albumin \_\_\_\_\_

Hemodialysis  Yes  
 No

BMI \_\_\_\_\_

OPTN\_SLK\_Criteria  Yes  
 No

MELD\_list \_\_\_\_\_

MELD\_NA\_list \_\_\_\_\_

# Transplant\_Characteristics

date\_kid\_Tx

(if Kidney is transplanted at a later time )

Date\_SLKT

S\_cr\_LT

Dialysis\_LT

- Yes  
 No

MELD\_Na\_LT

MELD\_LT

BMI\_LT

Status\_LT

- Ambulatory  
 Hospitalized

Hospitalized\_Type

- Floor  
 ICU

Ventilator

- Yes  
 No

RRI

(can be calculated at <https://rri.med.umich.edu>)

PRA

## Transplant\_admission

Date\_Tx\_admission

Date\_LT\_discharge

Discharge\_status

- Yes  
 No  
(If died during the LT index hospitalization then 0)

Discharge\_type

- home  
 SAR

---

PostOp\_HD

- Yes
- No

---

post\_op\_HD\_Start\_date

\_\_\_\_\_

---

postop\_HD\_enddate

\_\_\_\_\_

---

Liver\_explant\_path

\_\_\_\_\_

---

Immunosuppression

- Tacrolimus
- Cyclosporine
- Everolimus
- Rappmune

---

Cell\_Cept

- Yes
- No

---

Induction

- Yes
- No

---

Induction\_type

- Basiliximab
- Thymoglobulin
- Dacluzimab
- Others

---

steroid

- Yes
- No

## Donor\_characteristics

### Liver\_donor\_characteristics

Donor\_age

\_\_\_\_\_

Donor\_sex

- Male  
 Female

Donor\_type

- DBD  
 DCD  
 Other

Cause\_of\_Death

- ANOXIA  
 CEREBROVASCULAR\_STROKE  
 HEAD TRAUMA  
 CNS TUMOR  
 OTHER SPECIFY

Cold\_Ischemia\_time

\_\_\_\_\_

Warm\_ischemia\_time

\_\_\_\_\_

Distance

- Local  
 Regional  
 National  
 unknown

### Kidney\_donor\_characteristics

Kid\_donor\_age

\_\_\_\_\_

KDPI

\_\_\_\_\_

# Post\_Tx\_1\_3\_5

## Outcomes

eGFR\_1year

\_\_\_\_\_

eGFR\_2yr

\_\_\_\_\_

eGFR\_3yr

\_\_\_\_\_

eGFR\_5yr

\_\_\_\_\_

New\_onsetDM\_1y

Yes  
 No

new-onset\_HTN

Yes  
 No

BMI\_1yr

\_\_\_\_\_

BMI\_3yr

\_\_\_\_\_

BMI\_5yr

\_\_\_\_\_

# outcomes\_LFU

---

Status\_LFU

- Alive
- Dead

---

Date\_last\_follow\_up

---

---

eGFR\_LFU

---

---

Re\_LT

- Yes
- No

---

Re\_LT\_yes

---

---

Renal\_failure

- Yes
- No

---

renal\_failure\_type

- AKI
- Stage4\_5CKD

---

Renal\_fail\_Rx

- RRT
- KT\_list

---

renal\_fail\_Rx\_date



# Post\_trans\_hosp\_6mon

---

Hospitalization\_within6months

- Yes  
 No

---

Hosp\_6mon\_number

---

---

Hosp\_6mon\_cause

- Kidney  
 Infection  
 Liver  
 CVS  
 Rejection  
 other

---

Hosp\_6mon\_renal

- Renal\_failure\_noRRT  
 Renal\_fail\_RRT  
 Rejection  
 Metabolic  
 Others

---

Hosp\_6mon\_Liver

- Biliary\_com  
 Vascular\_comp  
 Others

---

Hosp\_6\_mon\_rejection

- Kidney  
 Liver

---

Hosp\_6mon\_infection

- Bacterial  
 Viral  
 Other

---

hosp\_6mon\_CVS

- ACS  
 Arrhythmia  
 CHF  
 Other

## Post\_trans\_hosp\_6\_12mon

---

Hosp\_6\_12months

- Yes  
 No

---

Hosp\_6\_12mon\_number

---

---

Hosp\_6\_12mon\_cause

- Kidney  
 Infection  
 Liver  
 CVS  
 Rejection  
 other

---

Hosp\_6\_12\_renal

- Renal\_failure\_noRRT  
 Renal\_fail\_RRT  
 Rejection  
 Metabolic  
 Others

---

Hosp\_6\_12mon\_Liver

- Biliary\_com  
 Vascular\_comp  
 Others

---

Hosp\_6\_12mon\_rejection

- Kidney  
 Liver

---

Hosp\_6\_12mon\_infection

- Bacterial  
 Viral  
 Other

---

hosp\_6\_12mon\_CVS

- ACS  
 Arrhythmia  
 CHF  
 Other

## Post\_trans\_hosp\_greaterthan1yr

---

Hosp\_morethan12mon

- Yes  
 No

---

Hosp\_morethan12mon\_number

---

---

Hosp\_morethan12mon\_cause

- Kidney  
 Infection  
 Liver  
 CVS  
 Rejection  
 other

---

Hosp\_morethan12mon\_renal

- Renal\_failure\_noRRT  
 Renal\_fail\_RRT  
 Rejection  
 Metabolic  
 Others

---

Hosp\_morethan12mon\_Liver

- Biliary\_com  
 Vascular\_comp  
 Others

---

Hosp\_morethan12mon\_rej

- Kidney  
 Liver

---

Hosp\_morethan12mon\_infection

- Bacterial  
 Viral  
 Other

---

hosp\_morethan12mon\_CVS

- ACS  
 Arrhythmia  
 CHF  
 Other
